# Supplementary material for: Easy to build low-power GPS drifters with local storage and a cellular modem made from off-the-shelf components
Source: Copernicus journal article supplement (doi:10.5194/gi-9-435-2020), 2020-11-05
Supplement: Supplementary file 1 [file gi-9-435-2020-supplement.zip]

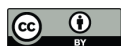

## *Supplement of*

# **Easy to build low-power GPS drifters with local storage and a cellular modem made from off-the-shelf components**

**Rolf Hut et al.**

*Correspondence to:* Rolf Hut ([r.w.hut@tudelft.nl](mailto:r.w.hut@tudelft.nl))

- [gi-9-435-2020-supplement-title-page.pdf](#)
- [Irrawaddy01.csv](#)
- [Irrawaddy02.csv](#)
- [Irrawaddy03.csv](#)
- [Irrawaddy04.csv](#)
- [Irrawaddy05.csv](#)
- [Irrawaddy06.csv](#)
- [Irrawaddy07.csv](#)
- [Irrawaddy08.csv](#)
- [Irrawaddy09.csv](#)
- [Irrawaddy10.csv](#)
- [Irrawaddy11.csv](#)
- [Irrawaddy12.csv](#)
- [Irrawaddy13.csv](#)
- [Irrawaddy14.csv](#)

The copyright of individual parts of the supplement might differ from the CC BY 4.0 License.
